# Supplementary material
Source: publisher site journal article supplement (https://www.dovepress.com/article/498738)
Supplement: Supplementary file 1 [file get_supplementary_file.php]

# Lactate ameliorates kainic acid-induced neuroinflammation and cognitive impairment via the chemokine signaling pathway in mice

# Supplemental data


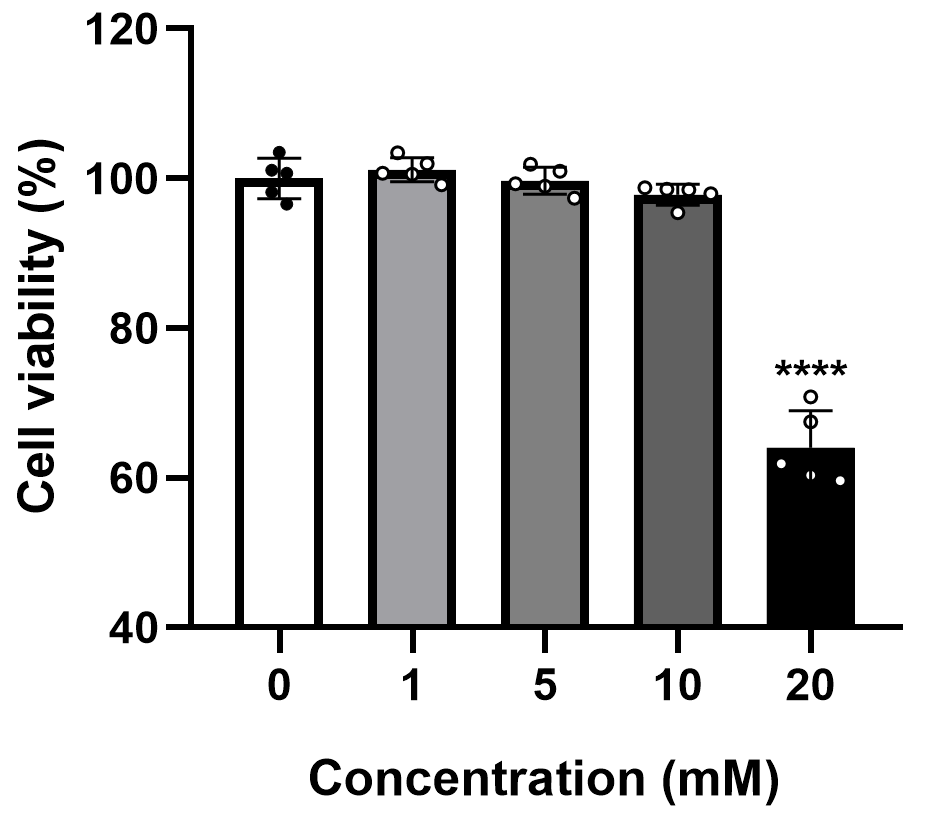


Supplemental figure 1. Cell viability of HT22 cells incubated with lactate at different concentrations (0, 1, 5, 10 and 20 mM) for 24 h (n=5 at each concentration). The data are presented as means ± SDs. Significance was determined by one-way ANOVA (*****P*<0.0001).


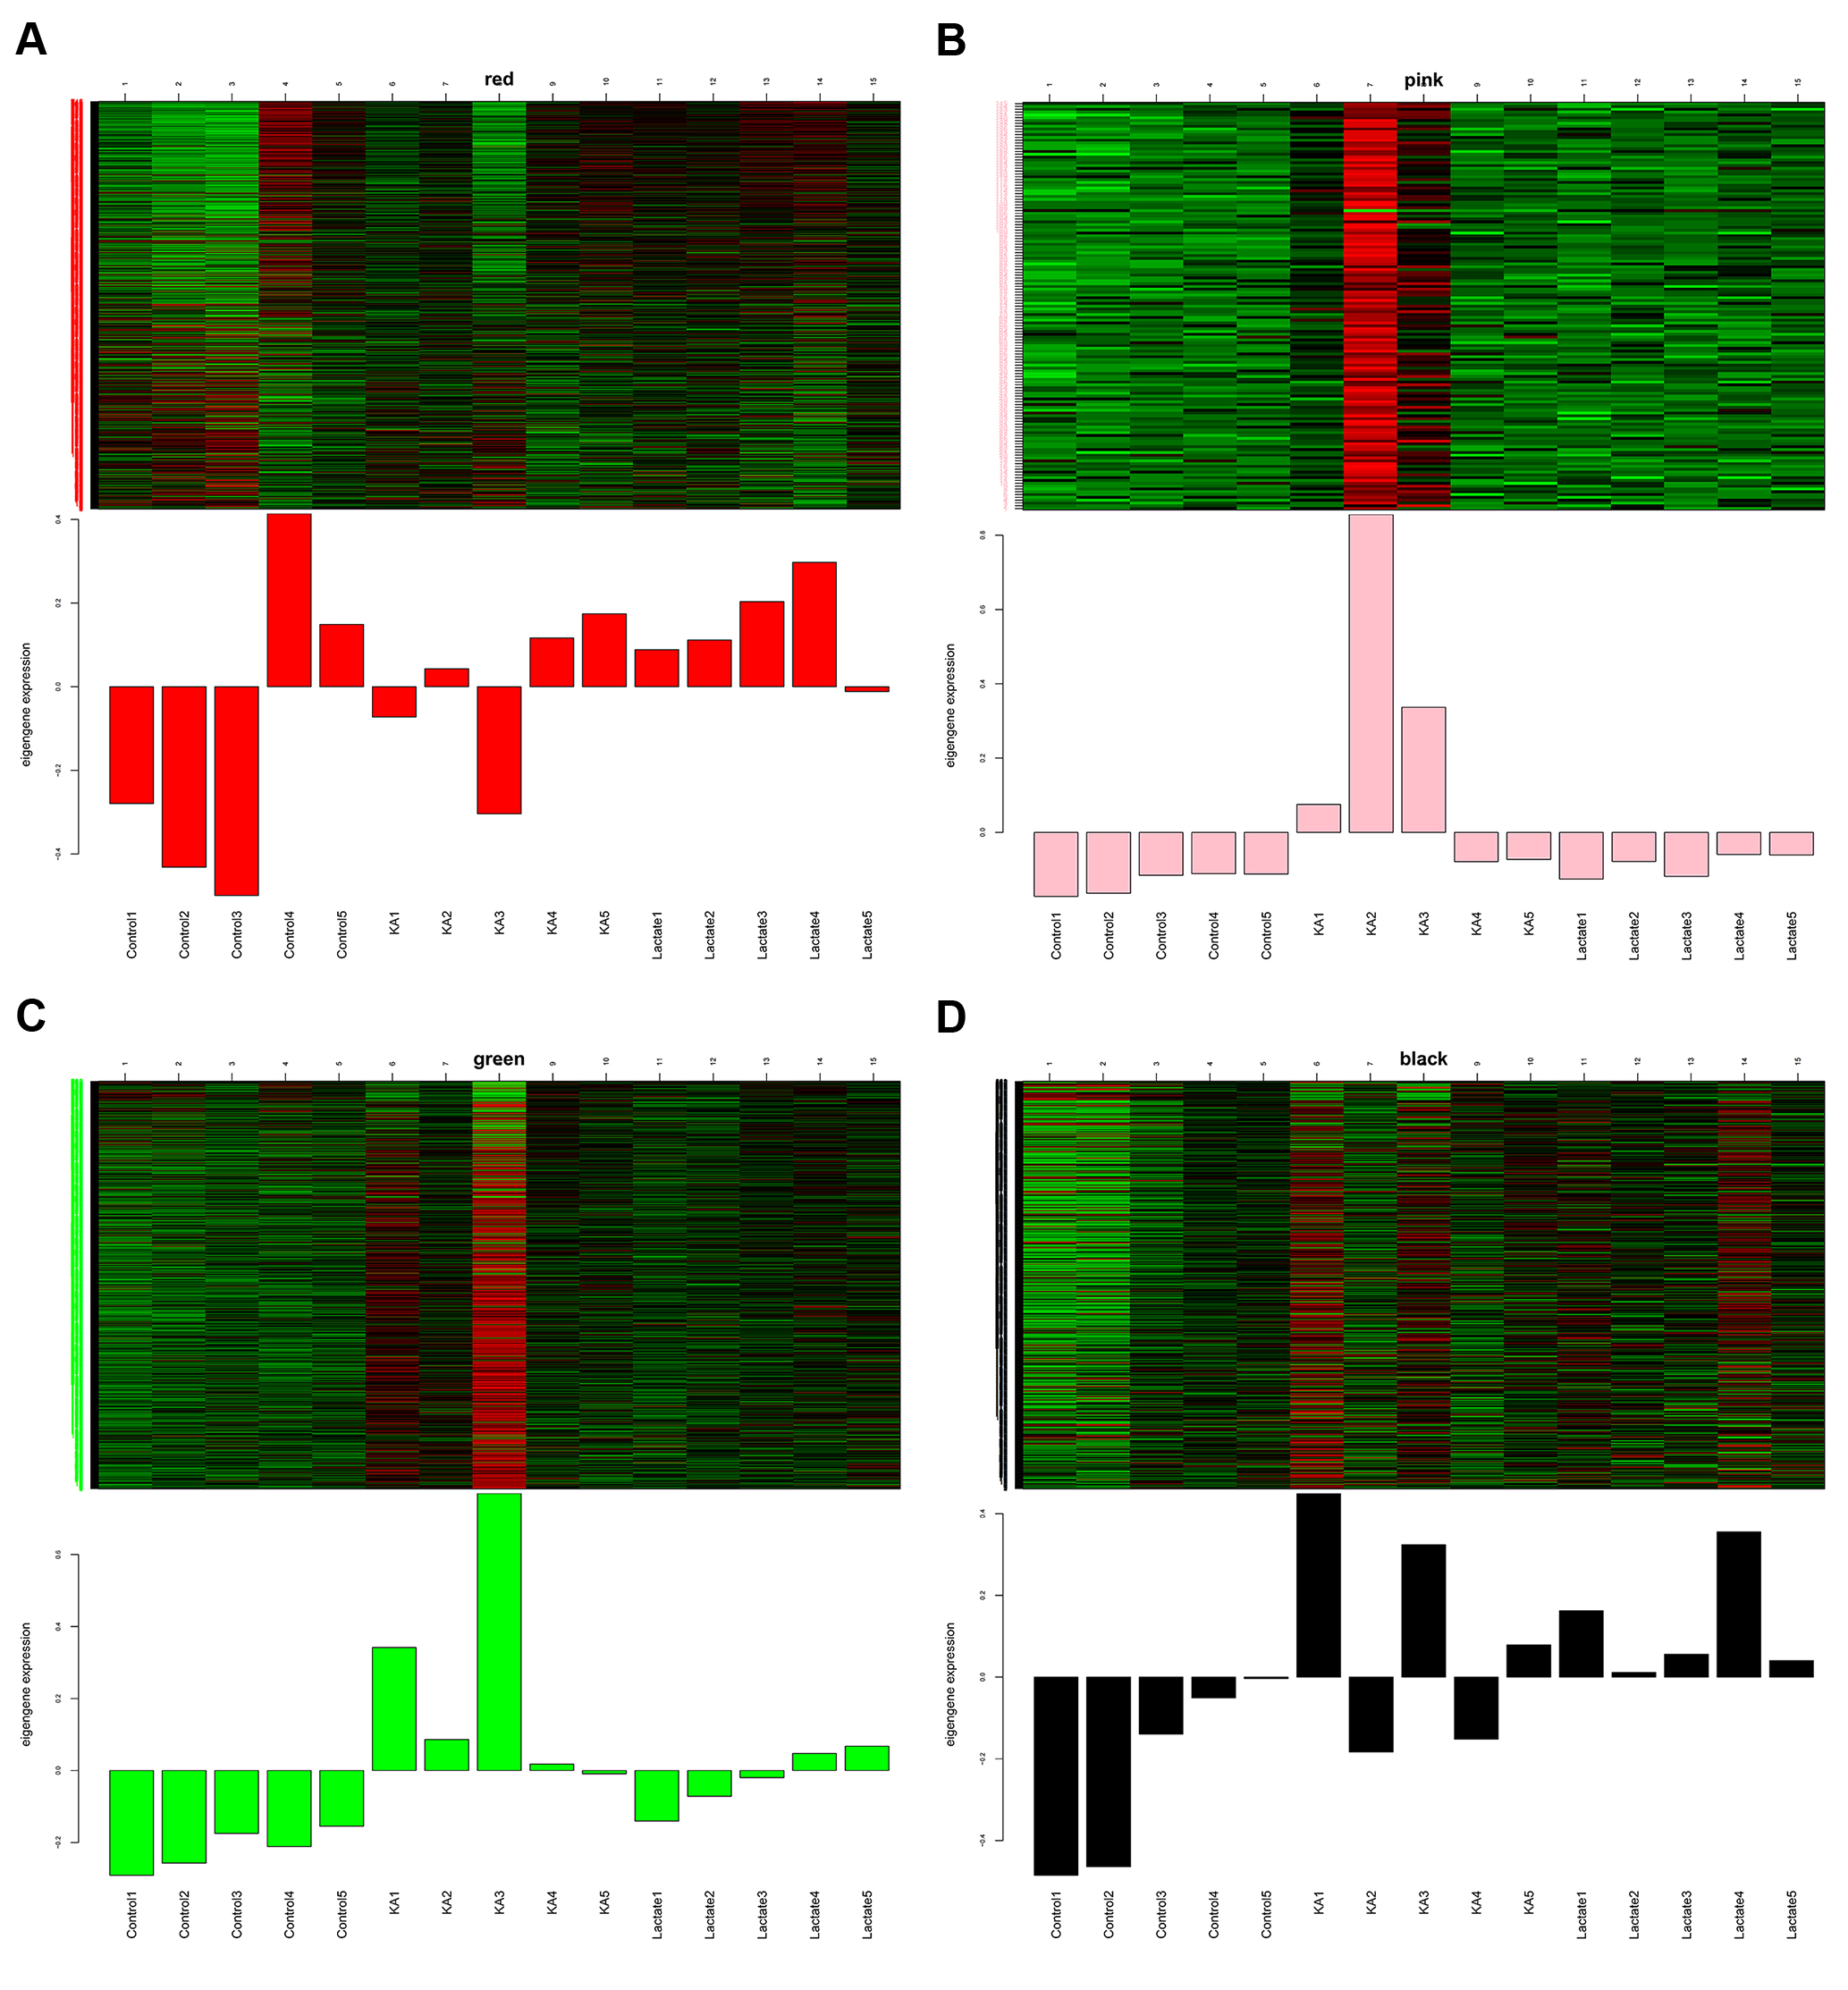


Supplemental figure 2. Heat maps and bar plots of eigengenes in red (A), pink (B), green (C) and black (D) modules.


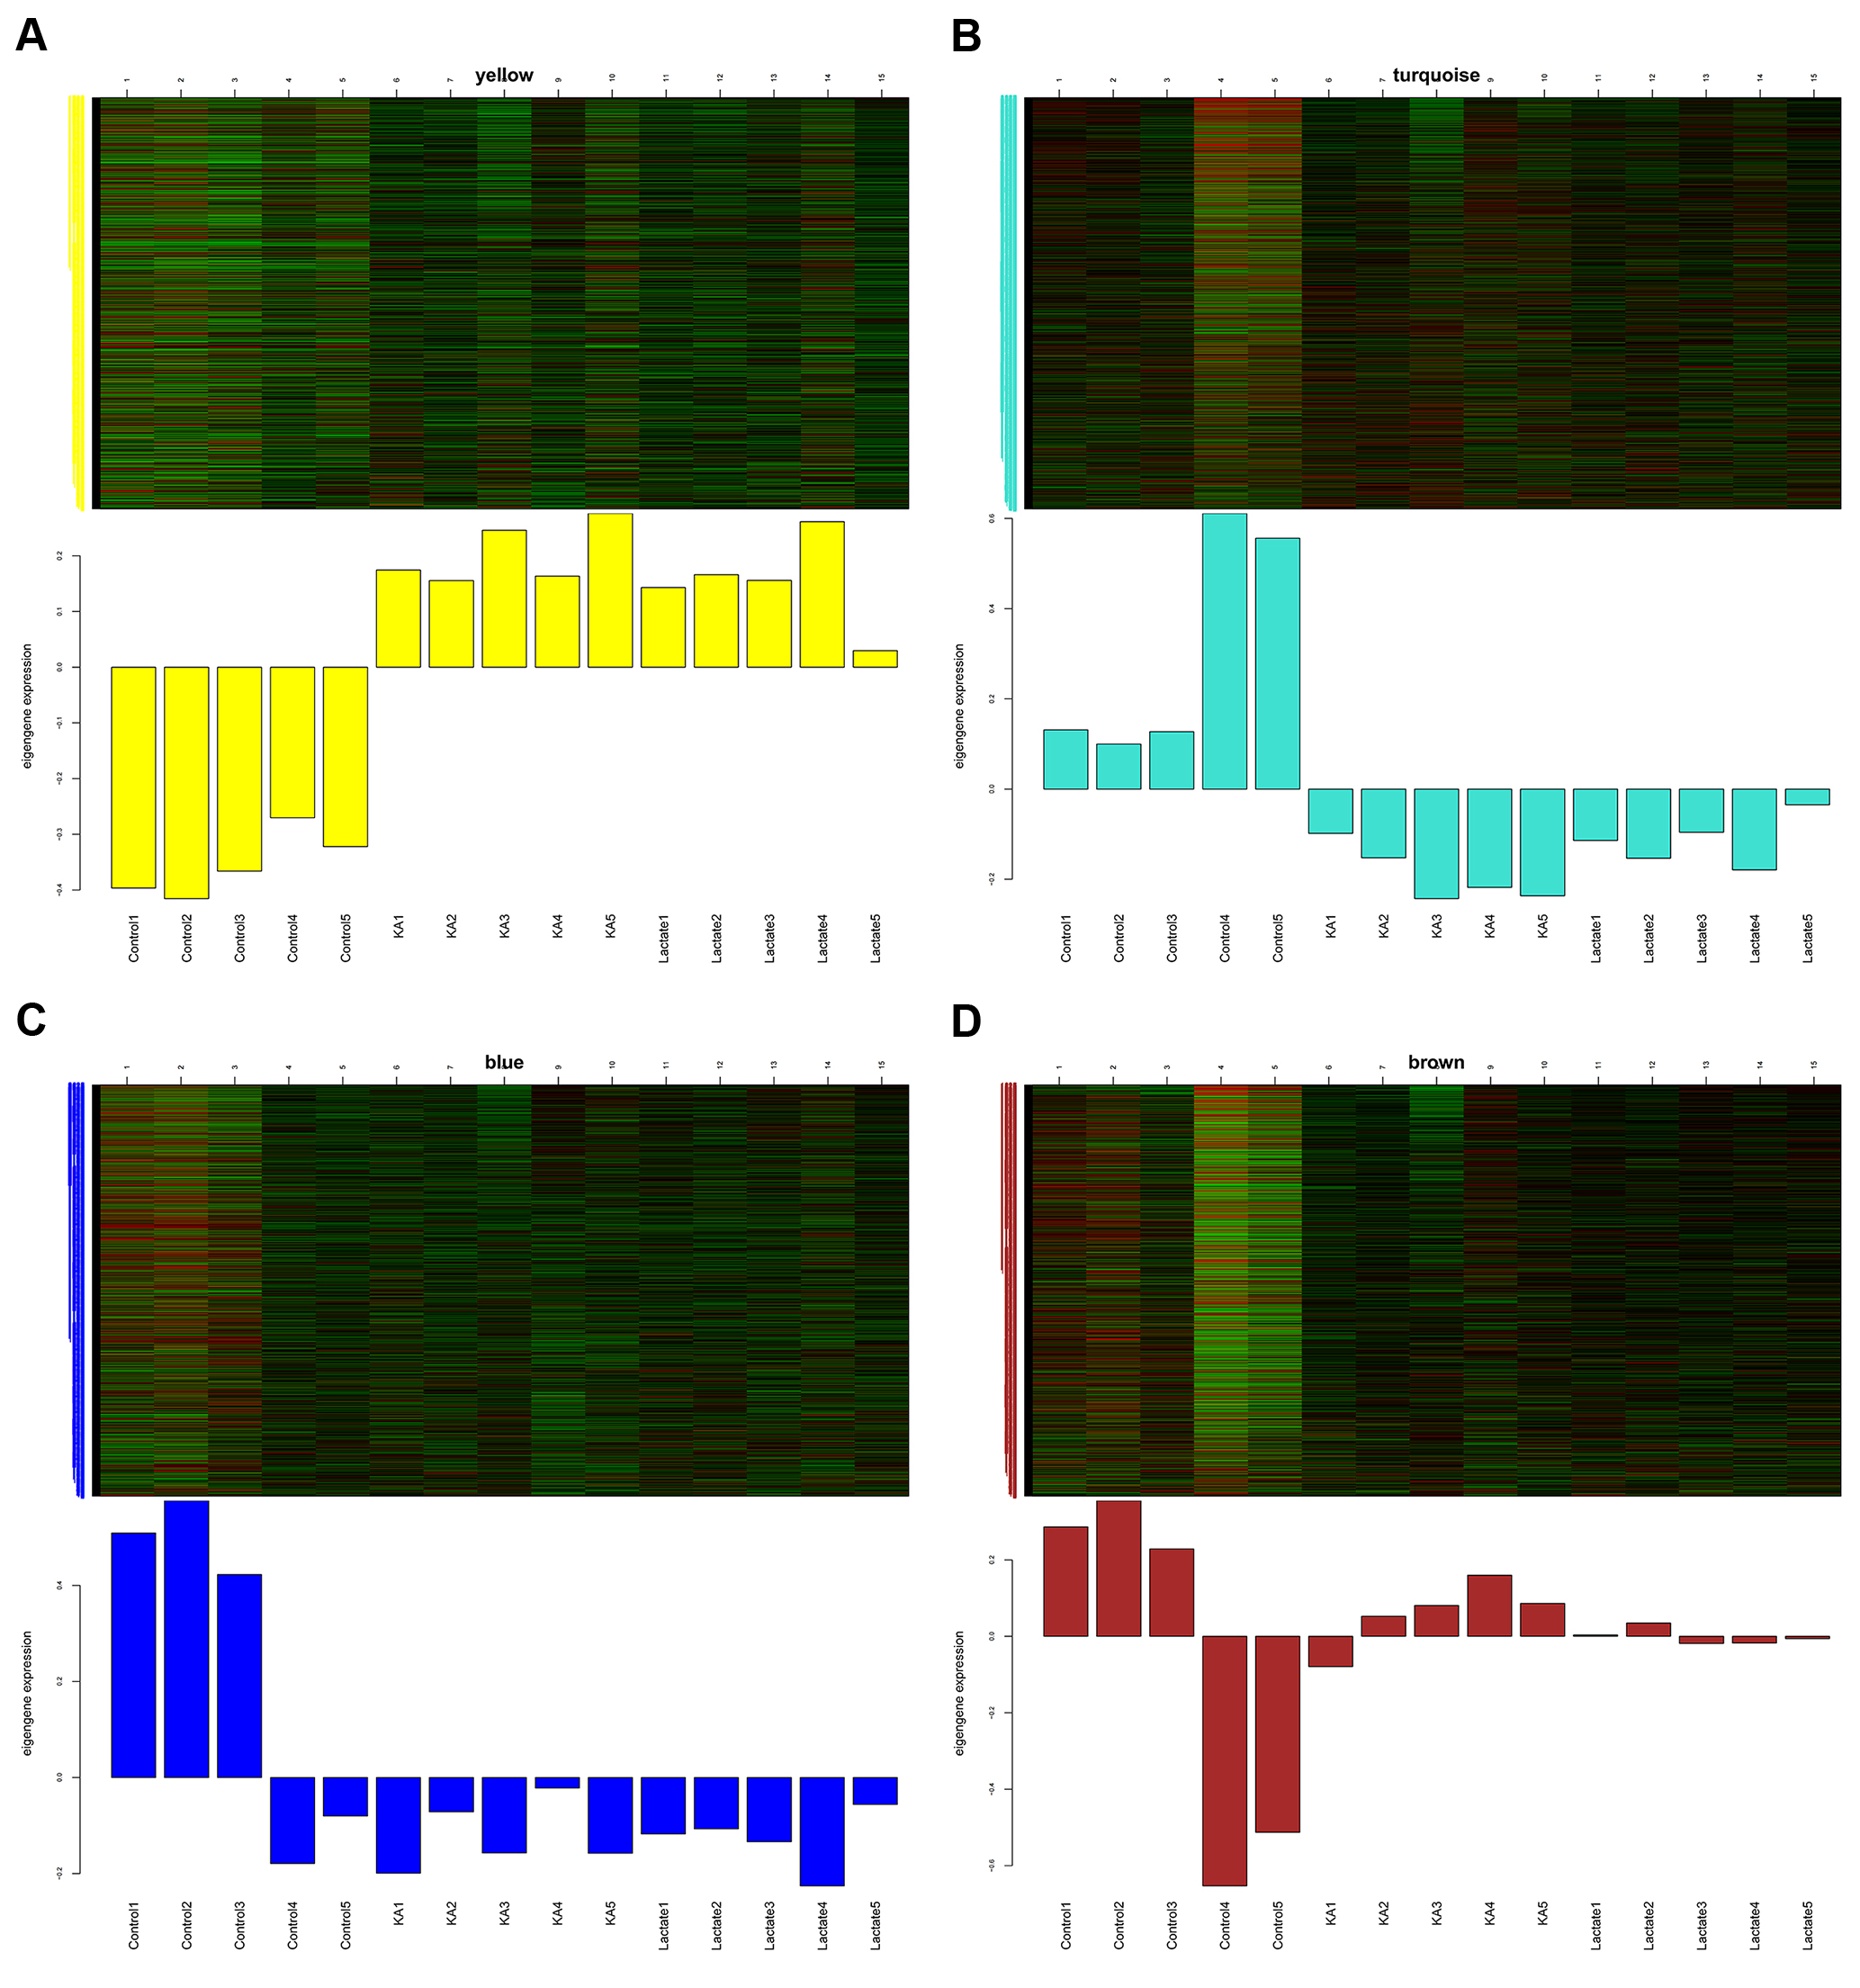


Supplemental figure 3. Heat maps and bar plots of eigengenes in yellow (A), turquoise (B), blue (C) and brown modules (D).
